# Supplementary material for: Indole-azadiene conjugate as a colorimetric and fluorometric probe for selective fluoride ion sensing
Source: Royal Society of Chemistry journal article supplement (doi:10.1039/b821466b), 2009-01-01
Supplement: b821466b.pdf [file b821466b.pdf]

## Indole-azadiene conjugate as a colorimetric and fluorometric probe for selective fluoride ion sensing

Yasuhiro Shiraishi,\* Hajime Maehara, and Takayuki Hirai

*Research Center for Solar Energy Chemistry, and Division of Chemical Engineering,  
Graduate School of Engineering Science, Osaka University, Toyonaka 560-8531, Japan  
E-mail: shiraish@cheng.es.osaka-u.ac.jp.*

### Electronic Supplementary Information (ESI†)

#### Contents

|                                                                                                                               | page |
|-------------------------------------------------------------------------------------------------------------------------------|------|
| Evidence for no FHF <sup>-</sup> dimer formation .....                                                                        | 2    |
| <b>Fig. S1</b> <sup>1</sup> H NMR chart for FHF <sup>-</sup> dimer in the absence and presence of <b>1</b> .....              | 3    |
| <b>Fig. S2</b> <sup>1</sup> H NMR chart of <b>1</b> .....                                                                     | 4    |
| <b>Fig. S3</b> <sup>13</sup> C NMR chart of <b>1</b> .....                                                                    | 5    |
| <b>Fig. S4</b> EI-MS chart of <b>1</b> .....                                                                                  | 6    |
| <b>Fig. S5</b> Results of competitive experiments.....                                                                        | 7    |
| <b>Fig. S6</b> Absorption and fluorescence spectra of indole.....                                                             | 8    |
| <b>Fig. S7</b> Absorption and fluorescence spectra of indole-3-carbaldehyde.....                                              | 8    |
| <b>Fig. S8</b> Benesi-Hildebrand plots of <b>1</b> assuming 1:1 stoichiometry.....                                            | 9    |
| <b>Fig. S9</b> Relationship between $\lambda_{\max}$ of <b>1</b> -2F <sup>-</sup> complex and dielectric constants.....       | 9    |
| <b>Table S1.</b> Calculation data for free <b>1</b> and <b>1</b> -F <sup>-</sup> and <b>1</b> -2F <sup>-</sup> complexes..... | 10   |
| Cartesian coordinates for free <b>1</b> and <b>1</b> -F <sup>-</sup> and <b>1</b> -2F <sup>-</sup> complexes.....             | 11   |

## Evidence for no FHF<sup>-</sup> dimer formation

Removal of the indolic NH protons of **1** by F<sup>-</sup> does not occur. This is explained by <sup>1</sup>H NMR titration with F<sup>-</sup>, as follows:

Fig. S1, A and B, are the <sup>1</sup>H NMR titration data with F<sup>-</sup> in the presence and absence of **1** (3.8 mM, in DMSO-d<sub>6</sub>). In the presence of **1** (Fig. S1A), as described in the manuscript, F<sup>-</sup> addition leads to disappearance of the indolic NH protons of **1** ( $\delta = 11.7$  ppm) and upfield shift of the other protons. In this case, new signals assigned to FHF<sup>-</sup> dimer appear at ca. 15–17 ppm. However, as shown in Fig. S1B, even in the absence of **1**, FHF<sup>-</sup> dimer signals also appear. As reported,<sup>[1,2]</sup> *n*-tetrabutylammonium fluoride (*n*-Bu<sub>4</sub>N<sup>+</sup>F<sup>-</sup>) used as the F<sup>-</sup> source is a hydrous salt and decomposed to form FHF<sup>-</sup> dimer. The FHF<sup>-</sup> dimer signals observed in the absence of **1** is the impurity contained in *n*-Bu<sub>4</sub>N<sup>+</sup>F<sup>-</sup>. The amount of FHF<sup>-</sup> in the absence and presence of **1** was determined by <sup>1</sup>H NMR analysis using CH<sub>2</sub>Cl<sub>2</sub> (7.6 mM) as an internal standard. The concentration of FHF<sup>-</sup> obtained in the absence and presence of **1** is plotted in Fig. S1C. The data clearly show that the FHF<sup>-</sup> concentration in the presence of **1** is almost the same as that obtained in the absence of **1**. As shown in Fig. S1A, up-field shift of the other protons of **1** almost stops upon addition of 15 equiv of F<sup>-</sup>, indicating that almost all of **1** interacts with F<sup>-</sup> at this F<sup>-</sup> concentration. **If the NH protons of **1** is completely removed by reaction with F<sup>-</sup> in a 1:2 stoichiometry, the FHF<sup>-</sup> concentration increases 3.8 mM. However, the FHF<sup>-</sup> concentration in the presence of 15 equiv of F<sup>-</sup> is almost the same as that in the absence of F<sup>-</sup>. The data clearly indicate that removal of NH protons of **1** does not occur in the present system.**

[1] R. K. Sharma, J. L. Fry, *J. Org. Chem.*, 1983, **48**, 2112.

[2] J. L. Sessler, H. Maeda, T. Mizuno, V. M. Lynch, H. Furuta, *J. Am. Chem. Soc.*, 2002, **124**, 13474.

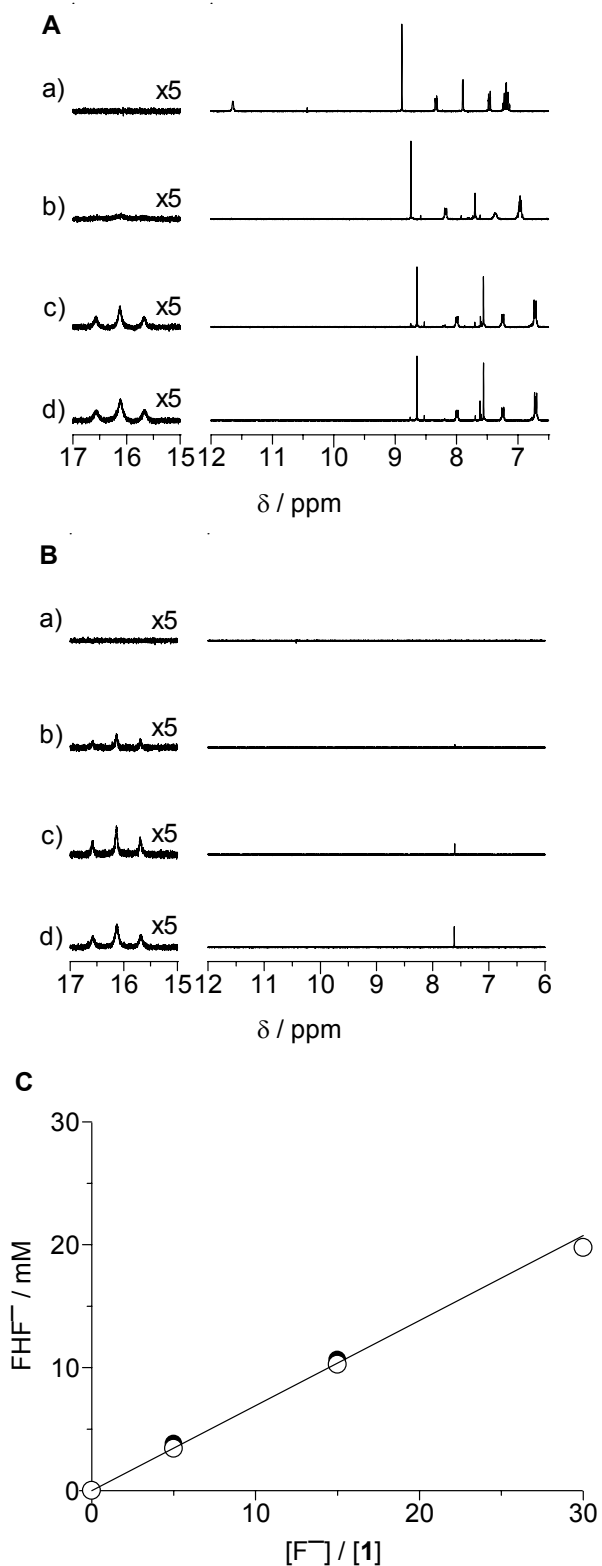

**Fig. S1**  $^1\text{H}$  NMR spectra upon addition of  $\text{F}^-$  in the (A) presence and (B) absence of **1** (3.8 mM) in  $\text{DMSO-d}_6$ . The equivalents of  $\text{F}^-$  added are (a) 0, (b) 5, (c) 15, and (d) 30, respectively. (C) Concentration of  $\text{FHF}^-$  dimer in solutions in the (black) presence and (white) absence of **1**, measured with  $\text{CH}_2\text{Cl}_2$  (7.6 mM) as an internal standard.

BIA.als  
BIA  
Fri Jun 08 14:15:02 2007  
1H  
SGNON  
270.05 MHz  
112.00 KHz  
5800.00 Hz  
32768  
5402.40 Hz  
16  
6.0655 sec  
0.9350 sec  
6.30 usec  
1H  
30.1 c  
DMSO  
0.00 ppm  
0.12 Hz  
22

DFILE  
COMNT  
DATIM  
EXMOD  
OBNUC  
OBFREQ  
OBSET  
OBFIN  
POINT  
FREQU  
SCANS  
ACQTM  
PD  
PWI  
IRNUC  
CTEMP  
SLVNT  
EXREF  
BF  
RGAIN

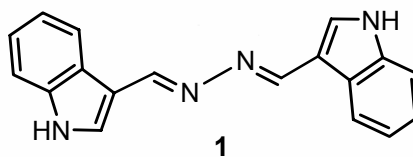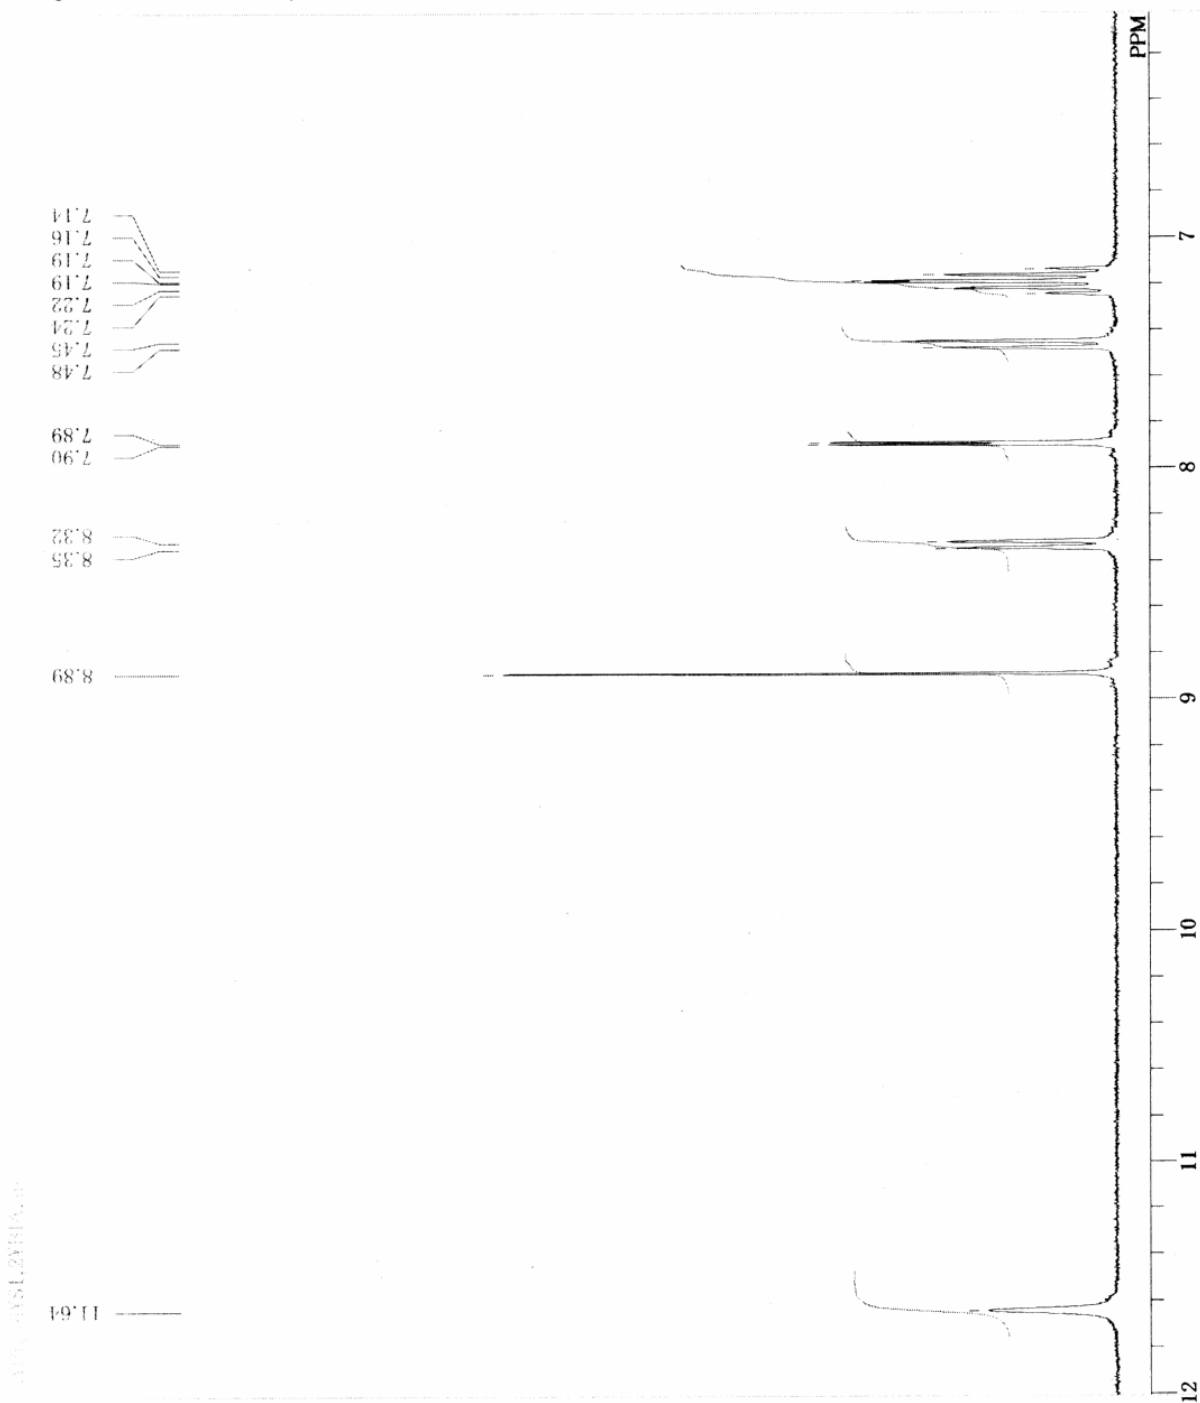

Fig. S2 <sup>1</sup>H NMR chart of **1** (DMSO-d<sub>6</sub>, 270 MHz)

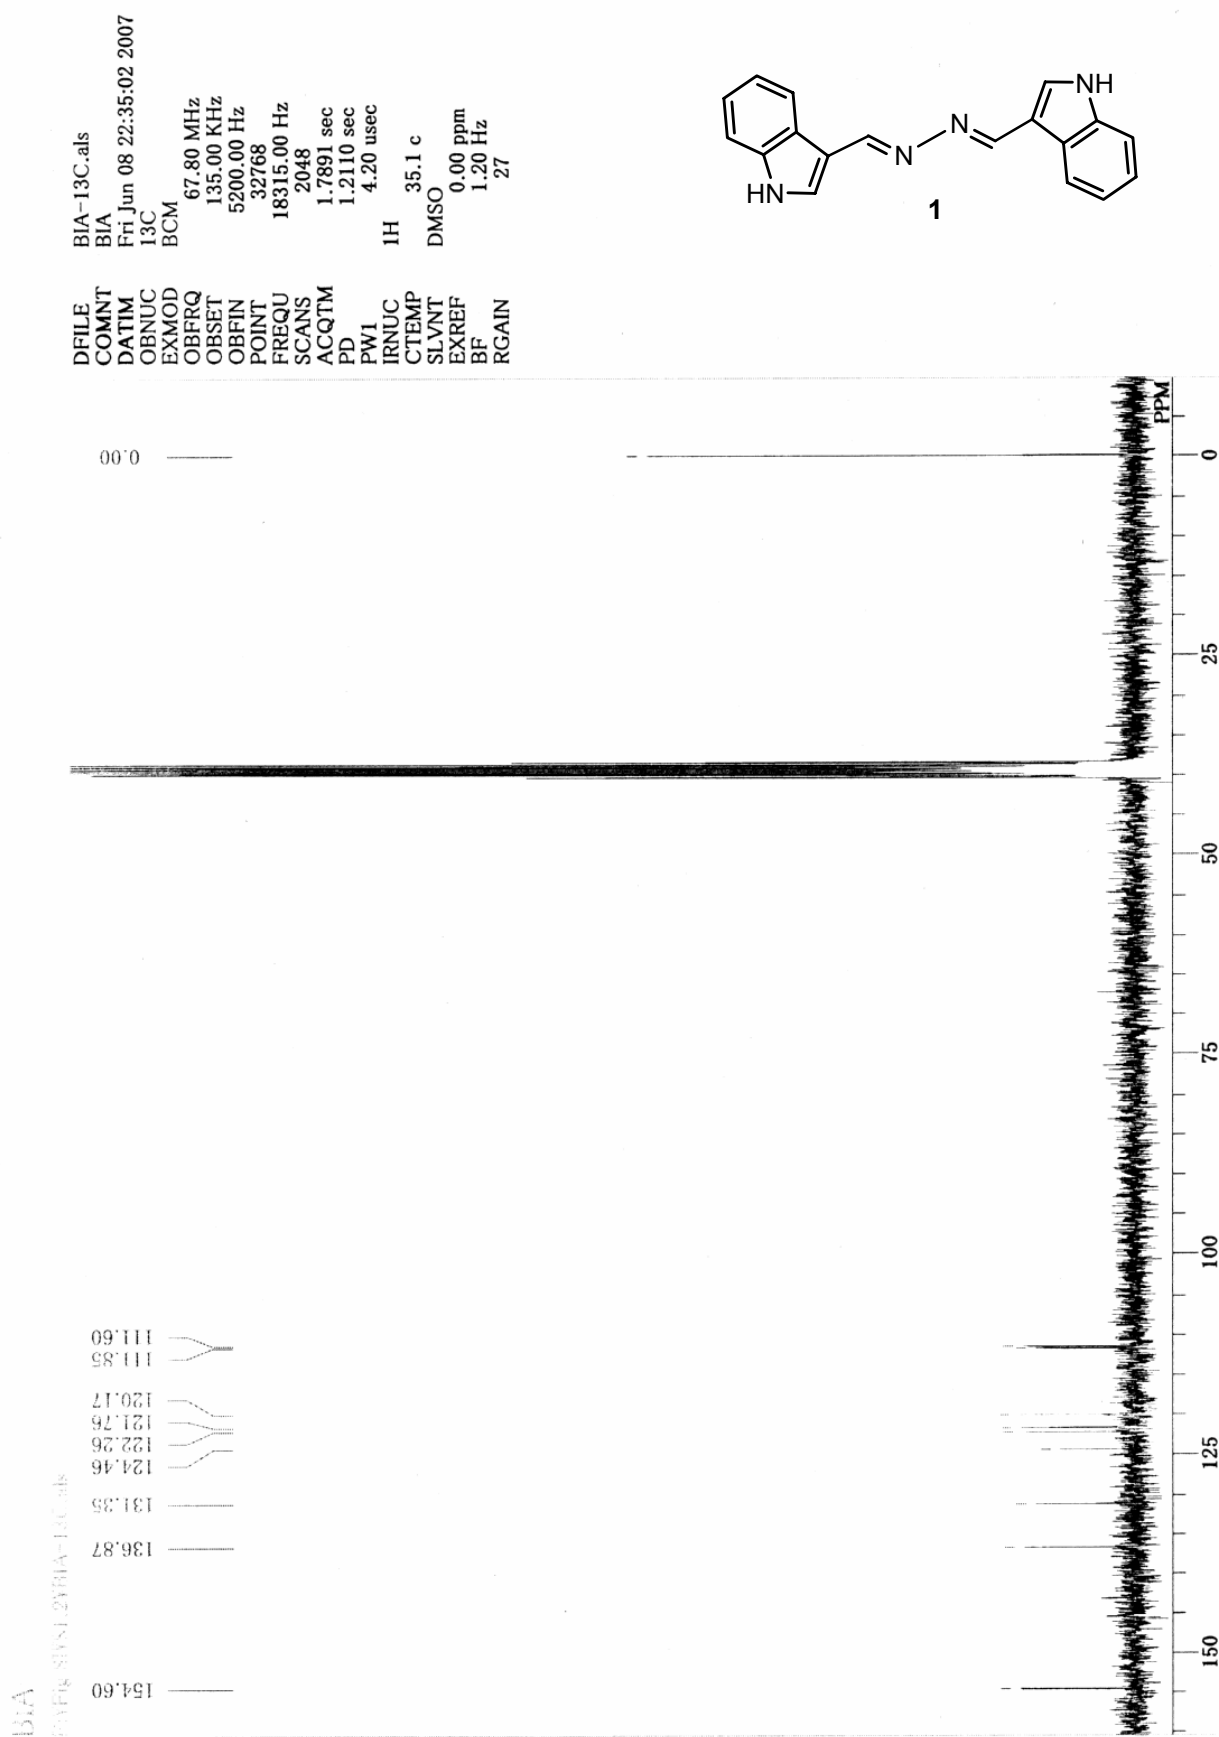

Fig. S3  $^{13}\text{C}$  NMR chart of **1** (DMSO- $d_6$ , 68 MHz)

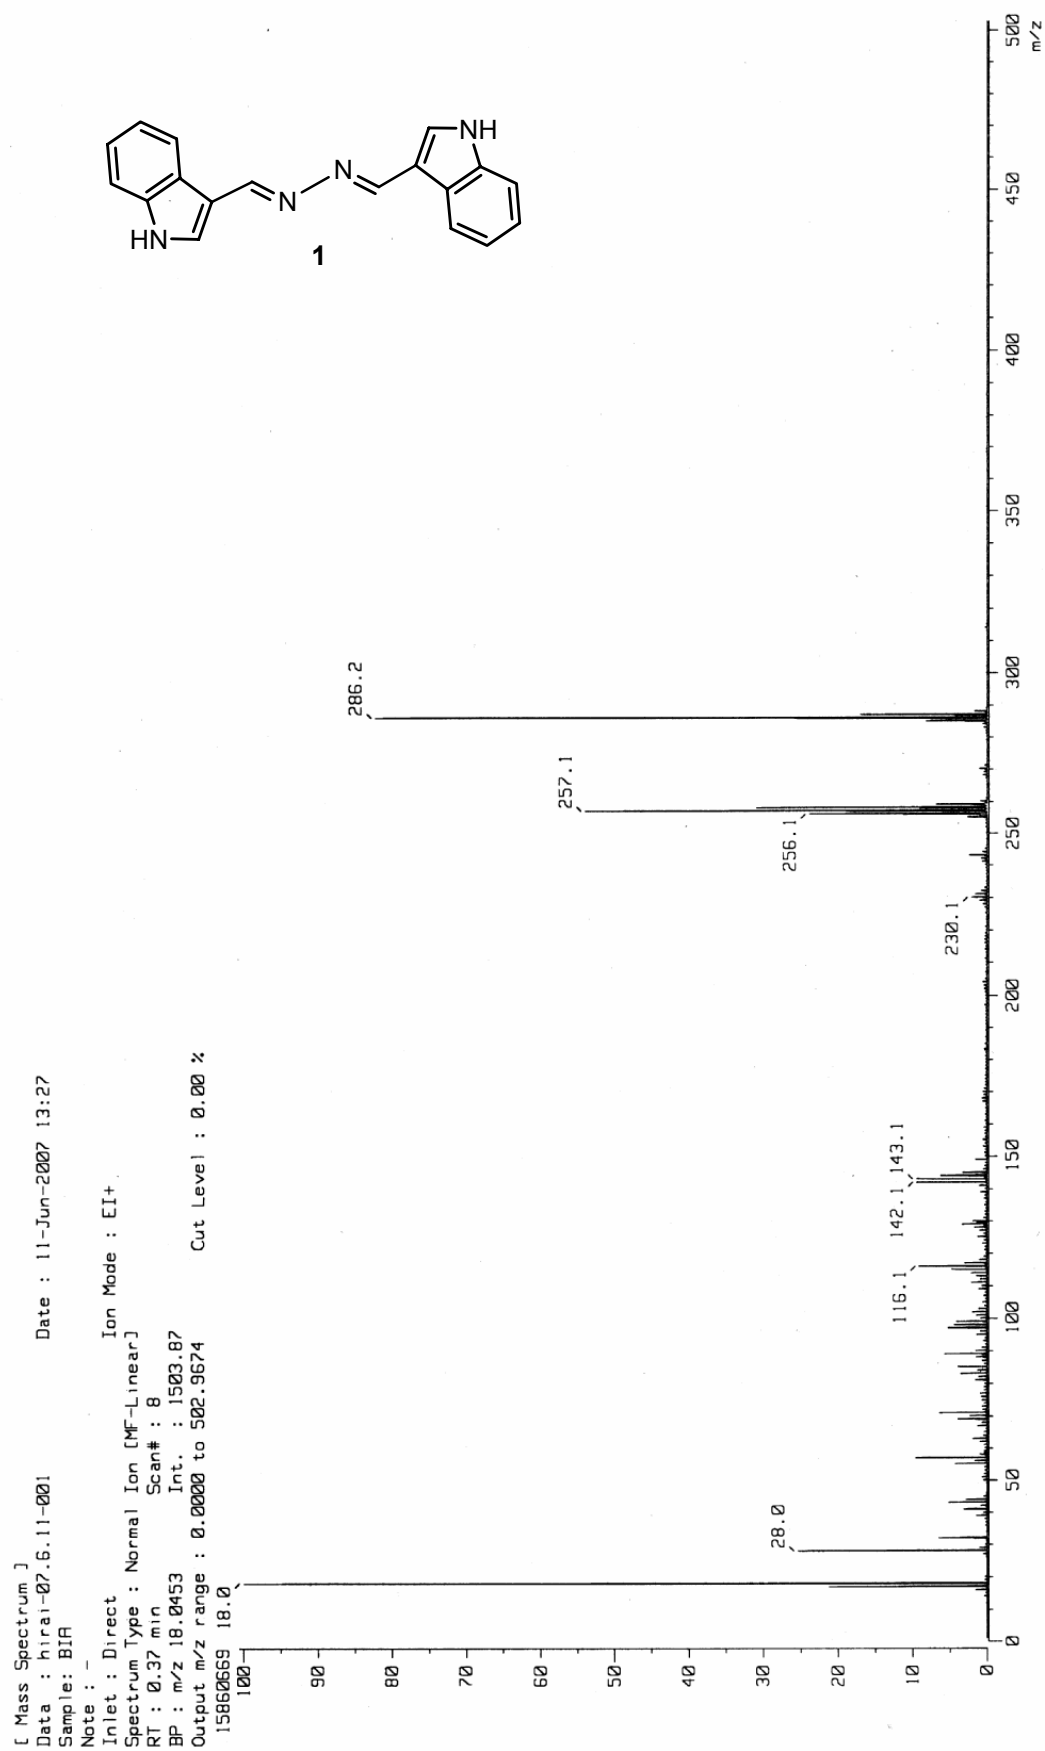

Fig. S4 EI-MS chart of 1.

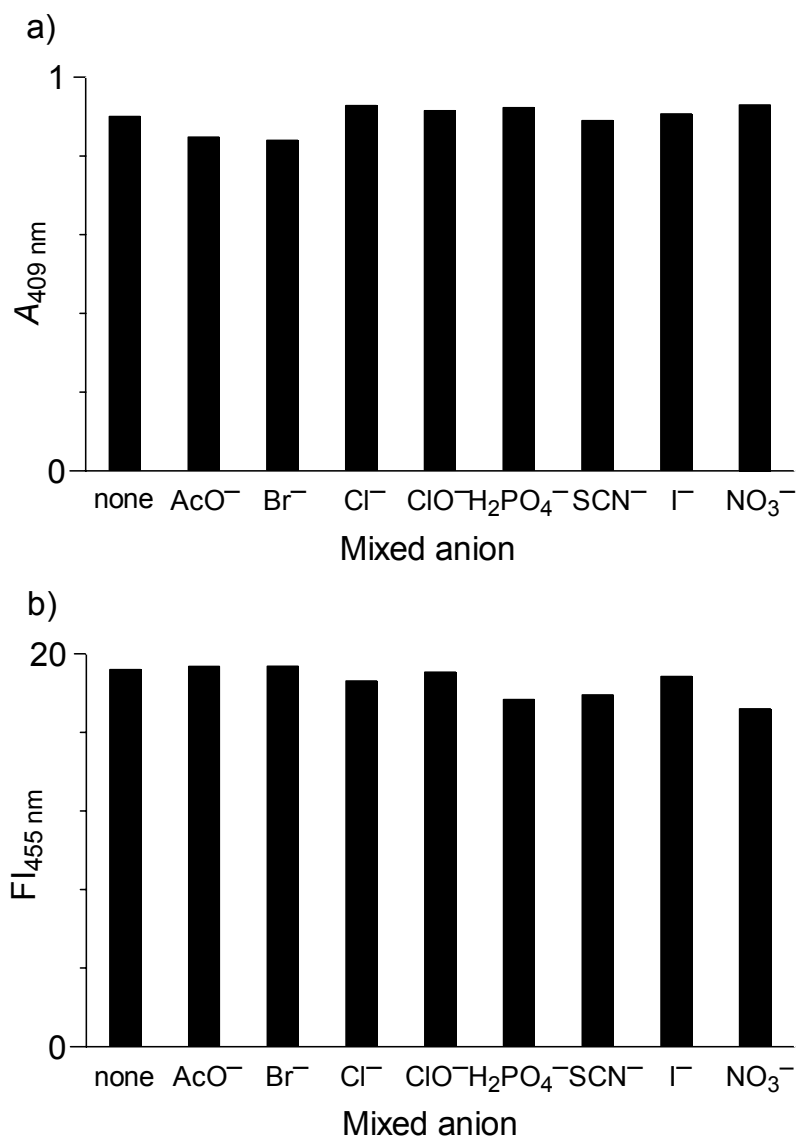

**Fig. S5** (a) Absorbance at 409 nm and (b) fluorescence ( $\lambda_{\text{ex}} = 420 \text{ nm}$ ) intensity at 455 nm of **1** (25  $\mu\text{M}$ ), when measured with 50 equiv of  $\text{F}^-$  in the presence of 50 equiv of other anions (as a  $n\text{-bu}_4\text{N}^+$  salt).

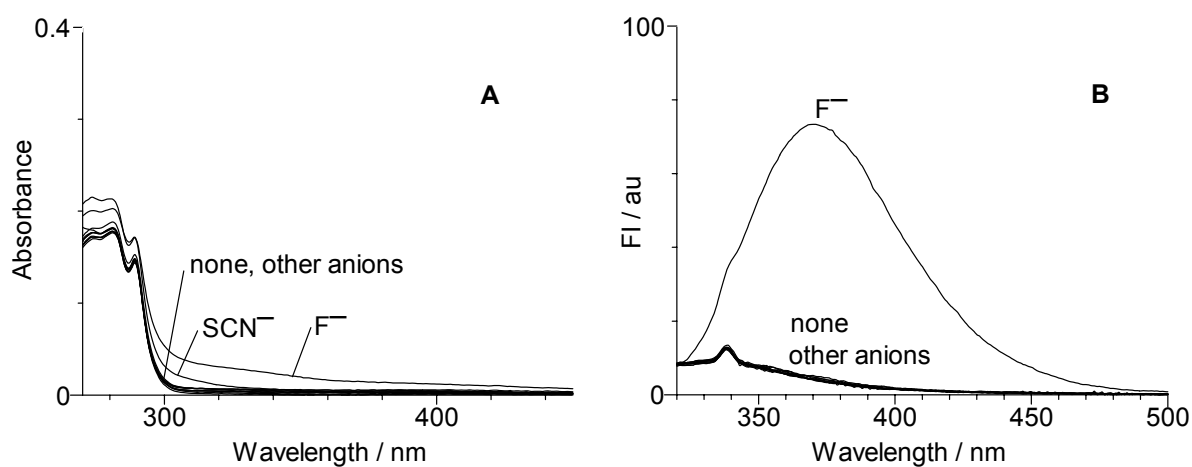

**Fig. S6** Change in (A) absorption and (B) fluorescence ( $\lambda_{\text{ex}} = 310$  nm) spectra of indole (25  $\mu\text{M}$ ) dissolved in DMSO upon addition of 50 equiv of respective anions (as a  $n\text{-bu}_4\text{N}^+$  salt).

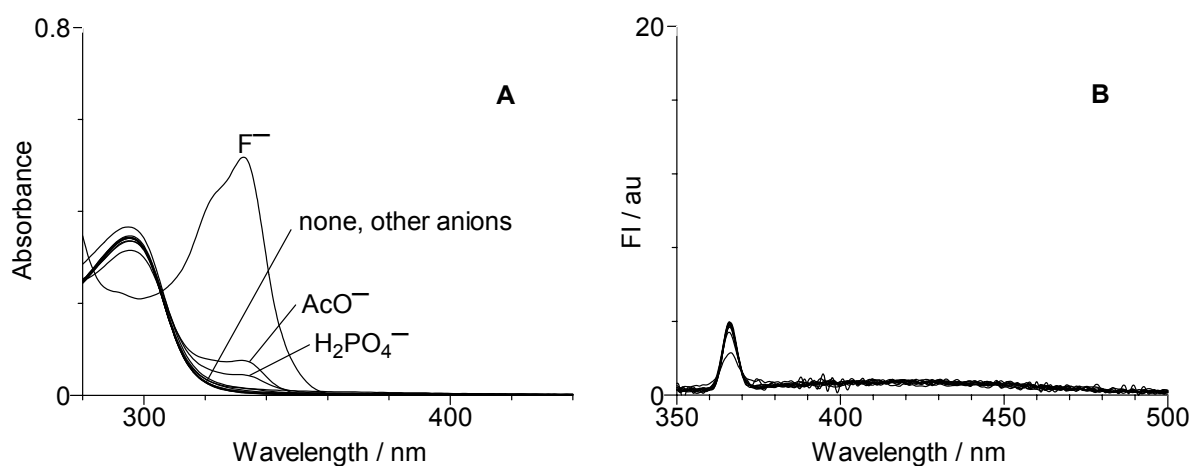

**Fig. S7** Change in (A) absorption and (B) fluorescence ( $\lambda_{\text{ex}} = 333$  nm) spectra of indole-3-carbaldehyde (25  $\mu\text{M}$ ) dissolved in DMSO upon addition of 50 equiv of respective anions (as a  $n\text{-bu}_4\text{N}^+$  salt).



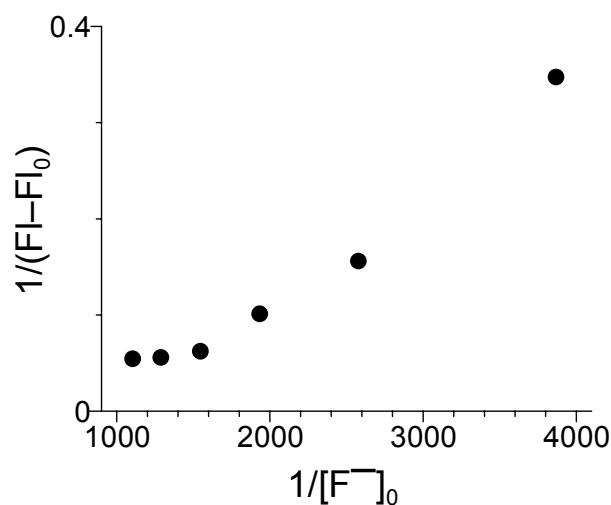

**Fig. S8** Benesi-Hildebrand plots ( $\lambda_{em} = 455$  nm) of **1**, assuming 1:1 stoichiometry for association between **1** and  $F^-$ .

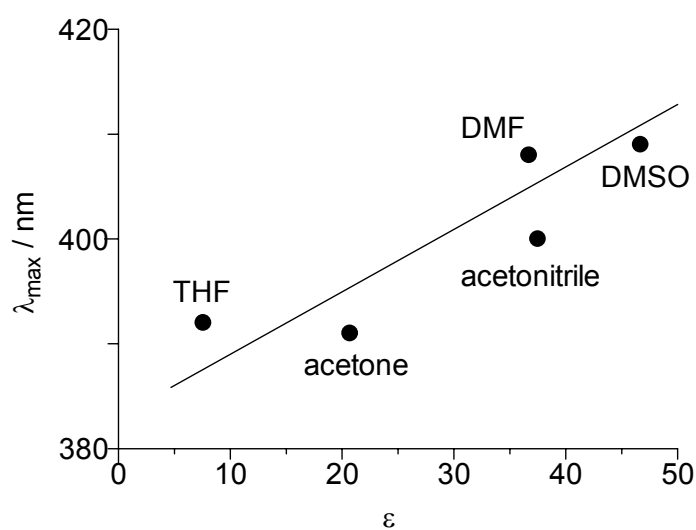

**Fig. S9** Relationship between  $\lambda_{max}$  of the absorption band of **1**- $2F^-$  complex and the dielectric constants for the medium,  $\epsilon$ , where the respective  $\epsilon$  values are cited from literature (B. R. Knauer and J. J. Napier, *J. Am. Chem. Soc.*, 1976, **98**, 4395). The measurements were carried out with **1** (25  $\mu$ M) and 500 equiv (THF), 200 equiv (acetone), 100 equiv (DMF), and 50 equiv (MeCN and DMSO) of  $F^-$ .

**Table S1.** Calculated excitation energy ( $E$ ), wavelength ( $\lambda$ ), and oscillator strength ( $f$ ) for low-lying singlet states ( $S_n$ ) of free **1** and **1-F<sup>-</sup>** and **1-2F<sup>-</sup>** complexes.

|                                                                                                                                                                     | orbital transition (CIC <sup>a</sup> ) | $E$ (eV) | $\lambda$ (nm) | $f$    |
|---------------------------------------------------------------------------------------------------------------------------------------------------------------------|----------------------------------------|----------|----------------|--------|
| 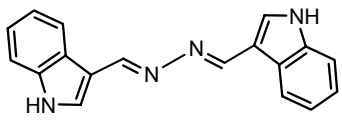<br><b>1</b><br>$\Delta H_f^\circ = -4082.93 \text{ kJ mol}^{-1}$                  |                                        |          |                |        |
| $S_0 \rightarrow S_1$                                                                                                                                               | HOMO $\rightarrow$ LUMO (0.65)         | 3.3157   | 373.93         | 1.2927 |
| $S_0 \rightarrow S_2$                                                                                                                                               | HOMO-4 $\rightarrow$ LUMO (0.69)       | 3.7258   | 332.78         | 0.0010 |
| $S_0 \rightarrow S_3$                                                                                                                                               | HOMO-1 $\rightarrow$ LUMO (0.56)       | 4.0162   | 308.71         | 0.0000 |
|                                                                                                                                                                     | HOMO $\rightarrow$ LUMO+1 (-0.40)      |          |                |        |
|                                                                                                                                                                     | HOMO-3 $\rightarrow$ LUMO (0.12)       |          |                |        |
| <br><b>1-F<sup>-</sup></b><br>$\Delta H_f^\circ = -5066.16 \text{ kJ mol}^{-1}$   |                                        |          |                |        |
| $S_0 \rightarrow S_1$                                                                                                                                               | HOMO $\rightarrow$ LUMO (0.65)         | 3.0712   | 403.70         | 1.3846 |
| $S_0 \rightarrow S_2$                                                                                                                                               | HOMO-2 $\rightarrow$ LUMO (0.69)       | 3.7247   | 332.87         | 0.0008 |
| $S_0 \rightarrow S_3$                                                                                                                                               | HOMO $\rightarrow$ LUMO (0.65)         | 3.7969   | 326.54         | 0.1416 |
|                                                                                                                                                                     | HOMO-2 $\rightarrow$ LUMO+1 (0.17)     |          |                |        |
|                                                                                                                                                                     | HOMO-1 $\rightarrow$ LUMO+1 (0.12)     |          |                |        |
| <br><b>1-2F<sup>-</sup></b><br>$\Delta H_f^\circ = -5633.54 \text{ kJ mol}^{-1}$ |                                        |          |                |        |
| $S_0 \rightarrow S_1$                                                                                                                                               | HOMO $\rightarrow$ LUMO (0.65)         | 2.9939   | 414.12         | 1.5771 |
| $S_0 \rightarrow S_2$                                                                                                                                               | HOMO-5 $\rightarrow$ LUMO (0.69)       | 3.5888   | 345.47         | 0.0008 |
|                                                                                                                                                                     | HOMO $\rightarrow$ LUMO+1 (0.64)       |          |                |        |
| $S_0 \rightarrow S_3$                                                                                                                                               | HOMO-1 $\rightarrow$ LUMO (-0.20)      | 3.7464   | 330.94         | 0.0000 |
|                                                                                                                                                                     | HOMO-3 $\rightarrow$ LUMO (-0.12)      |          |                |        |

<sup>a</sup> CI expansion coefficients for the main orbital transitions.

### Cartesian Coordinates (in Å) of 1

|   |           |           |           |   |           |           |           |
|---|-----------|-----------|-----------|---|-----------|-----------|-----------|
| C | 1.665692  | 0.241590  | -0.000340 | C | -6.065273 | -1.804907 | 0.000438  |
| N | 0.555401  | -0.420039 | -0.000227 | C | -4.699490 | -1.548277 | 0.000250  |
| N | -0.555401 | 0.420039  | -0.000442 | C | -4.255697 | -0.215638 | 0.000039  |
| C | -1.665692 | -0.241590 | -0.000171 | H | 1.646045  | 1.336337  | -0.000352 |
| C | 2.952324  | -0.416489 | -0.000281 | H | -1.646045 | -1.336337 | 0.000366  |
| C | 3.180611  | -1.780150 | -0.000355 | H | 2.460566  | -2.585259 | -0.000501 |
| N | 4.530173  | -2.024075 | -0.000201 | H | 4.952126  | -2.940102 | -0.001058 |
| C | 5.222952  | -0.824298 | 0.000023  | H | 7.321102  | -1.385558 | 0.000287  |
| C | 6.597931  | -0.574076 | 0.000279  | H | 8.067003  | 0.987595  | 0.000652  |
| C | 7.005752  | 0.755081  | 0.000480  | H | 6.417417  | 2.832788  | 0.000644  |
| C | 6.065273  | 1.804907  | 0.000461  | H | 3.987072  | 2.368899  | 0.000232  |
| C | 4.699489  | 1.548277  | 0.000218  | H | -2.460566 | 2.585258  | -0.000524 |
| C | 4.255697  | 0.215638  | -0.000028 | H | -4.952126 | 2.940103  | -0.000243 |
| C | -2.952324 | 0.416489  | -0.000157 | H | -7.321102 | 1.385558  | 0.000154  |
| C | -3.180611 | 1.780150  | -0.000346 | H | -8.067003 | -0.987595 | 0.000553  |
| N | -4.530173 | 2.024074  | -0.000245 | H | -6.417417 | -2.832788 | 0.000615  |
| C | -5.222952 | 0.824298  | 0.000011  | H | -3.987072 | -2.368899 | 0.000282  |
| C | -6.597931 | 0.574076  | 0.000189  |   |           |           |           |
| C | -7.005752 | -0.755080 | 0.000406  |   |           |           |           |

### Cartesian Coordinates (in Å) of 1-F<sup>-</sup> Complex

|   |           |           |           |   |           |           |           |
|---|-----------|-----------|-----------|---|-----------|-----------|-----------|
| C | 1.268422  | -0.417775 | -0.000212 | C | -6.415399 | 1.926207  | 0.000521  |
| N | 0.195267  | 0.340921  | -0.000314 | C | -5.056005 | 1.633278  | 0.000341  |
| N | -0.954494 | -0.418689 | -0.000401 | C | -4.641148 | 0.291245  | 0.000043  |
| C | -2.045064 | 0.277960  | -0.000177 | H | -5.414120 | -2.844322 | -0.000413 |
| C | 2.595659  | 0.071937  | -0.000122 | H | 5.510497  | 2.630216  | -0.000268 |
| C | 3.029756  | 1.425663  | -0.000096 | F | 6.392232  | 3.087413  | -0.000316 |
| N | 4.358634  | 1.557537  | -0.000181 | H | 1.127997  | -1.506565 | -0.000166 |
| C | 4.870157  | 0.267146  | 0.000084  | H | -2.000621 | 1.372416  | 0.000056  |
| C | 6.217697  | -0.107875 | 0.000281  | H | 2.379882  | 2.294472  | -0.000157 |
| C | 6.520065  | -1.467579 | 0.000444  | H | 6.977363  | 0.668645  | 0.000279  |
| C | 5.494060  | -2.435091 | 0.000416  | H | 7.559759  | -1.790500 | 0.000584  |
| C | 4.150032  | -2.063429 | 0.000227  | H | 5.756758  | -3.491962 | 0.000542  |
| C | 3.819653  | -0.699053 | 0.000063  | H | 3.373067  | -2.826784 | 0.000217  |
| C | -3.348234 | -0.362245 | -0.000198 | H | -2.904676 | -2.536652 | -0.000723 |
| C | -3.608058 | -1.717235 | -0.000479 | H | -7.748366 | -1.233396 | 0.000039  |
| N | -4.974255 | -1.938012 | -0.000317 | H | -8.437840 | 1.157087  | 0.000560  |
| C | -5.636117 | -0.727903 | -0.000061 | H | -6.741350 | 2.963376  | 0.000756  |
| N | -7.004516 | -0.439603 | 0.000114  | H | -4.321251 | 2.434045  | 0.000431  |
| C | -7.381503 | 0.899505  | 0.000407  |   |           |           |           |

### Cartesian Coordinates (in Å) of 1-2F<sup>-</sup> Complex

|   |           |           |           |   |           |           |           |
|---|-----------|-----------|-----------|---|-----------|-----------|-----------|
| F | -6.841838 | 2.978717  | 0.000845  | C | -6.879838 | -1.611659 | -0.000379 |
| C | 1.642440  | 0.413675  | 0.000208  | C | -5.819210 | -2.545559 | -0.000392 |
| N | 0.598749  | -0.361120 | 0.000216  | C | -4.489565 | -2.127635 | -0.000282 |
| N | -0.598782 | 0.361077  | 0.000172  | C | -4.198670 | -0.751259 | -0.000154 |
| C | -1.642472 | -0.413718 | 0.000218  | H | -5.950187 | 2.503989  | 0.000691  |
| C | 3.002871  | -0.053443 | 0.000101  | H | 5.950400  | -2.503812 | 0.000712  |
| C | 3.474353  | -1.382469 | -0.000073 | F | 6.842177  | -2.978303 | 0.000604  |
| N | 4.821095  | -1.479835 | 0.000296  | H | 1.485578  | 1.501353  | 0.000133  |
| C | 5.287072  | -0.183216 | -0.000039 | H | -1.485610 | -1.501396 | 0.000234  |
| C | 6.621971  | 0.243396  | -0.000168 | H | 2.852106  | -2.271503 | -0.000126 |
| C | 6.879777  | 1.611621  | -0.000369 | H | 7.407843  | -0.507878 | -0.000079 |
| C | 5.819149  | 2.545517  | -0.000453 | H | 7.909262  | 1.969714  | -0.000438 |
| C | 4.489512  | 2.127573  | -0.000340 | H | 6.045639  | 3.611838  | -0.000585 |
| C | 4.198646  | 0.751191  | -0.000131 | H | 3.686910  | 2.864495  | -0.000387 |
| C | -3.002906 | 0.053398  | 0.000050  | H | -2.852180 | 2.271471  | -0.000414 |
| C | -3.474405 | 1.382423  | -0.000264 | H | -7.407852 | 0.507868  | -0.000191 |
| N | -4.821155 | 1.479747  | 0.000148  | H | -7.909323 | -1.969748 | -0.000425 |
| C | -5.287100 | 0.183145  | -0.000149 | H | -6.045708 | -3.611878 | -0.000459 |
| C | -6.622007 | -0.243438 | -0.000261 | H | -3.686982 | -2.864578 | -0.000266 |
